# Supplementary material
Source: PubMed Central journal article supplement (PMC2818883)
Supplement: NIHMS167916-supplement-1_si_001.pdf [file NIHMS167916-supplement-1_si_001.pdf]

## SUPPORTING INFORMATION

### **Oxovanadium(IV) Cyclam and Bicyclam Complexes: Potential CXCR4 Receptor Antagonists**

**Allison Ross, Dinesh C. Soares, Danielle Covelli, Christophe Pannecouque, Laura Budd, Anna Collins, Neil Robertson, Simon Parsons, Erik De Clercq, Pierre Kennepohl, and Peter J. Sadler**

#### Contents

1. Antiviral testing
2. EXAFS data
3. EPR
4. Experimental for V<sup>IV</sup>O-aqua (cyclam and bicyclam) complexes
5. Solution IR and conductivity measurements
6. Crystallographic parameters
7. References

## 1. Antiviral testing

For experimental protocols for antiviral testing, see Pannecouque, Daelemans and De Clercq *Nat. Protocol.* **2008**, 3, 427-434.<sup>1</sup>

Cyclam complexes **1** (sulfate) and **2** (chloride) were inactive against both HIV-1 (strain III<sub>B</sub>) and HIV-2 (strain ROD).

**Table S1.** Anti-HIV and cytotoxicity evaluation in III<sub>B</sub> and ROD cell cultures

| Complex  | Strain           | IC <sub>50</sub><br>( $\mu$ M) | CC <sub>50</sub><br>( $\mu$ M) | SI | Max Prot<br>% | Appr | av. IC <sub>50</sub><br>( $\mu$ M) | av. CC <sub>50</sub><br>( $\mu$ M) | SI |
|----------|------------------|--------------------------------|--------------------------------|----|---------------|------|------------------------------------|------------------------------------|----|
| <b>1</b> | III <sub>B</sub> | > 340                          | > 340                          | x1 | 5             | 1    |                                    |                                    |    |
|          |                  | > 340                          | > 340                          | x1 | 4             | 1    | > 340                              | > 340                              | x1 |
|          | ROD              | > 340                          | > 340                          | x1 | 27            | 2    |                                    |                                    |    |
|          |                  | > 340                          | > 340                          | x1 | 24            | 2    | > 340                              | > 340                              | x1 |
| <b>2</b> | III <sub>B</sub> | > 360                          | > 360                          | x1 | 4             | 1    |                                    |                                    |    |
|          |                  | > 360                          | > 360                          | x1 | 7             | 1    | > 360                              | > 360                              | x1 |
|          | ROD              | > 360                          | > 360                          | x1 | 14            | 2    |                                    |                                    |    |
|          |                  | > 360                          | > 360                          | x1 | 14            | 2    | > 360                              | > 360                              | x1 |

## 2. EXAFS data

**Table S2.** Statistical parameters from best R-space fits and all k-space data for complexes 1-4.

| Sample    | Number of Independent Variables | Chi Square | Reduced Chi Square | R-Factor |
|-----------|---------------------------------|------------|--------------------|----------|
| 1         | 12                              | 34.5       | 85.4               | 0.0027   |
| 2         | 12                              | 49.2       | 22.4               | 0.0031   |
| 3         | 10                              | 217.1      | 99.7               | 0.0011   |
| 4 (Fit 1) | 12                              | 23.9       | 59.1               | 0.0037   |
| 4 (Fit 2) | 11                              | 27.1       | 19.3               | 0.0042   |

**Figure S2.** EXAFS k-space data for complexes **1-4**

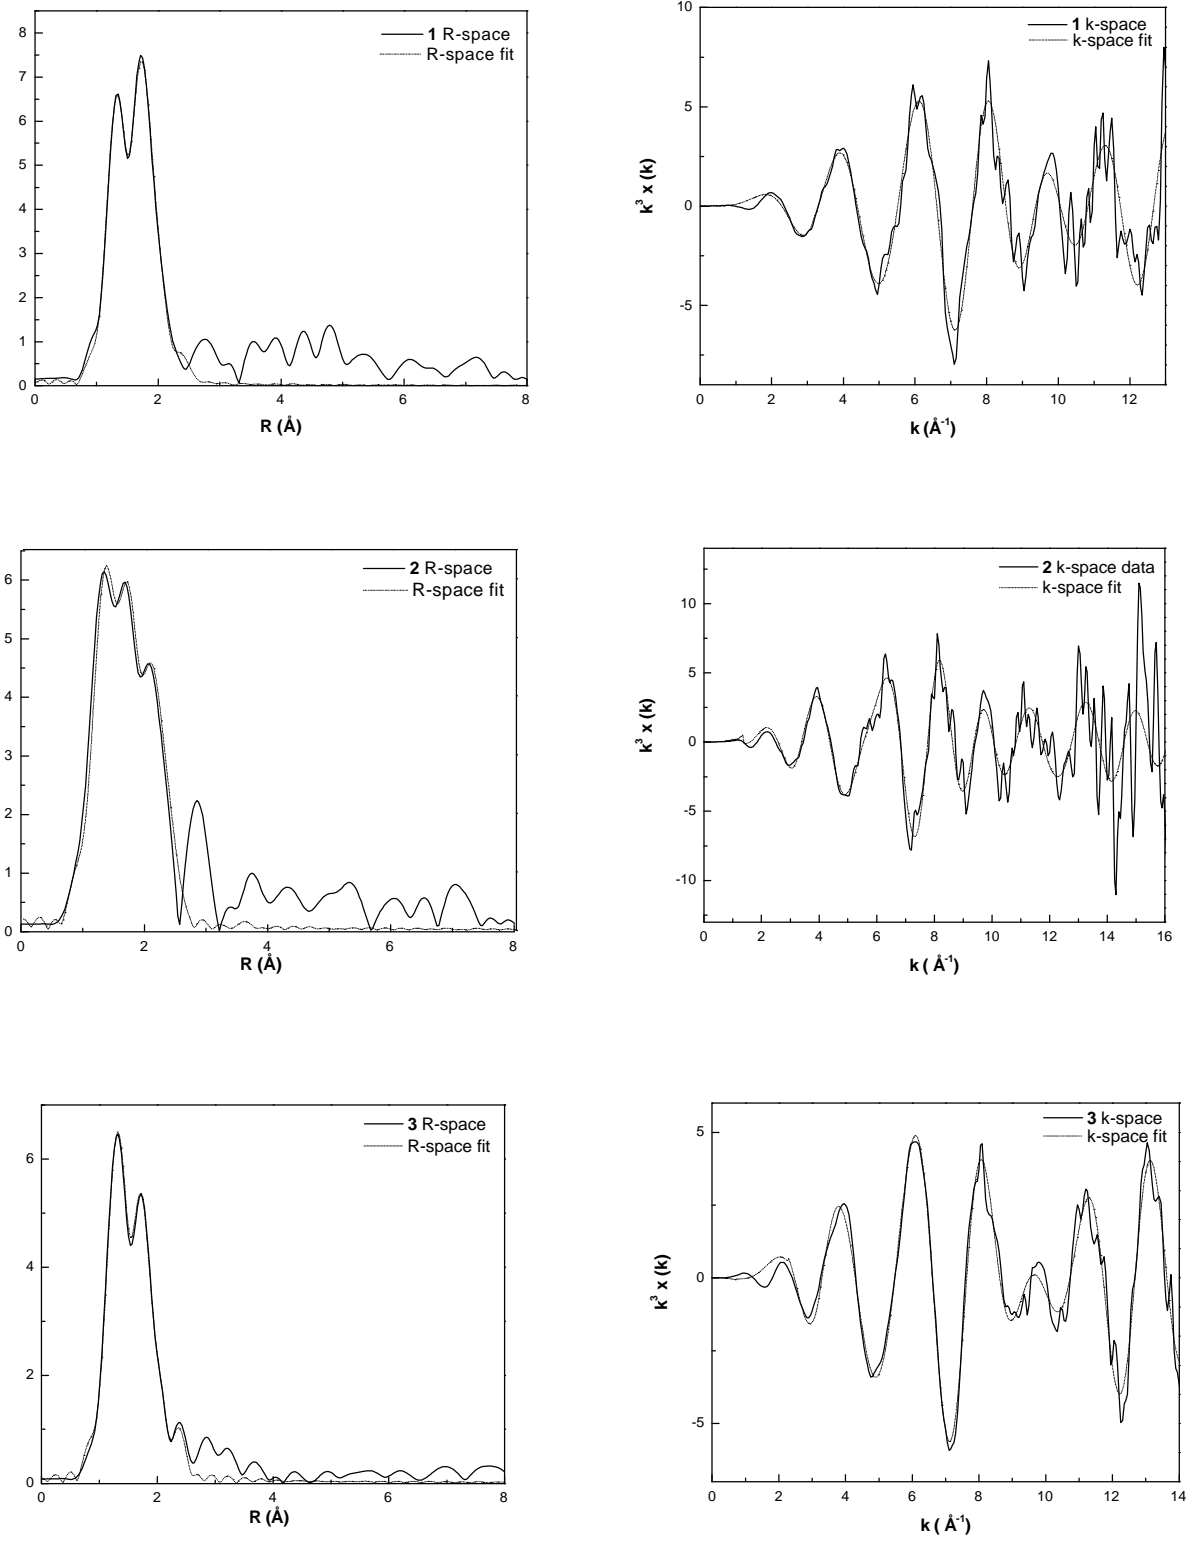

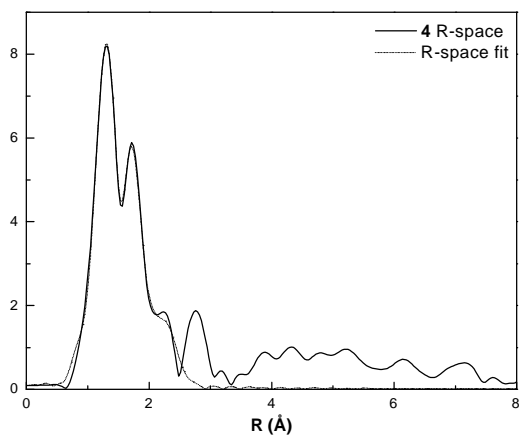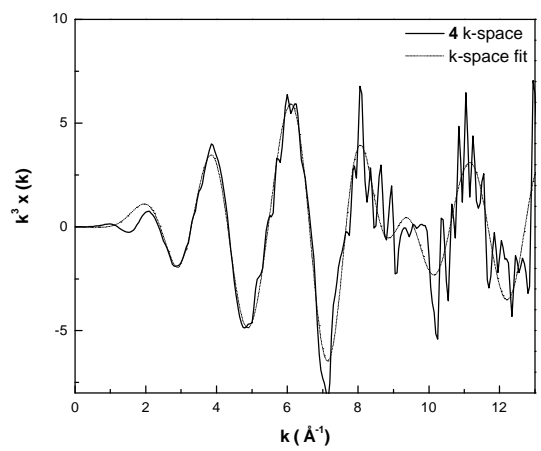

### 3. EPR – simulated spectra

**Figure S3.**

(a)  $V^{IV}$ O-cyclam sulfate, **1** in water at 298 K

( $g = 1.972$ ,  $A / G = 88$ )

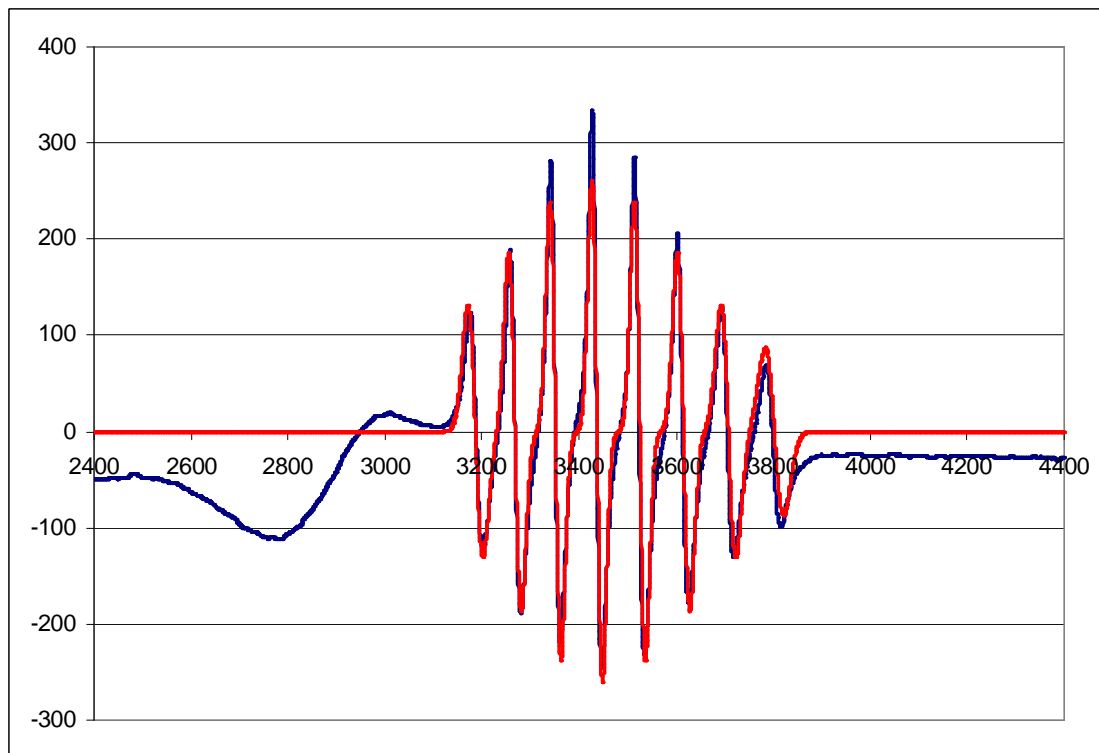

(b)  $V^{IV}$ O-cyclam sulfate, **1** in methanol at 298 K

( $g = 1.972$ ,  $A / G = 88$ )

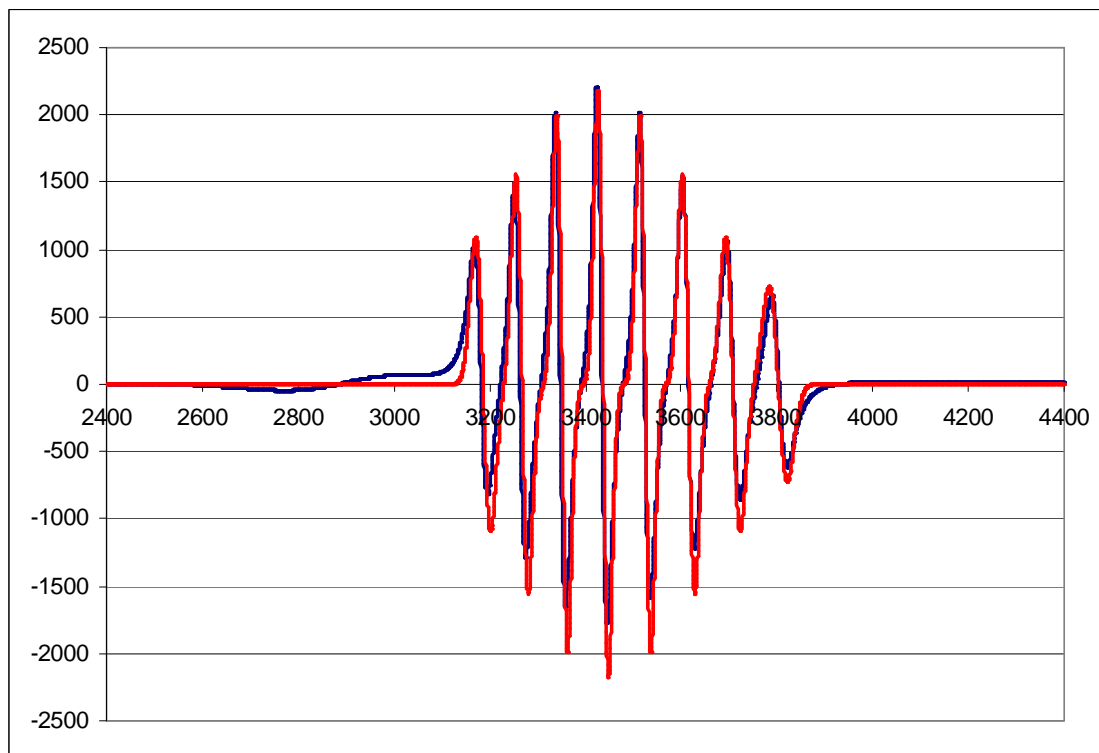

(c)  $V^{IV}$ O-cyclam sulfate, **1** in methanol at 77 K

( $g_{x,y} = 1.983$ ,  $A_z / G = 53$ ;  $g_z = 1.968$ ,  $A_z / G = 167$ )

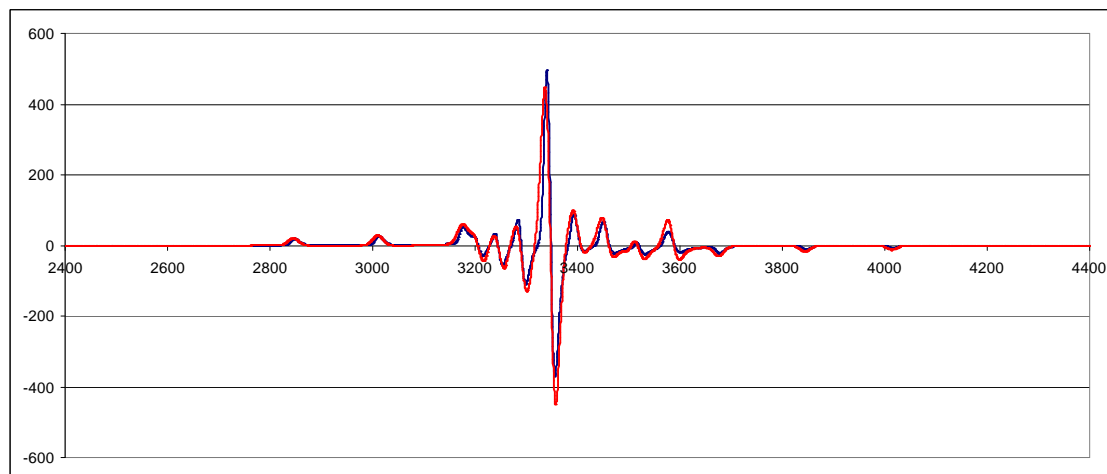



(d)  $V^{IV}$ O-cyclam chloride, **2** in water at 298 K

( $g = 1.972$ ,  $A / G = 88$ )

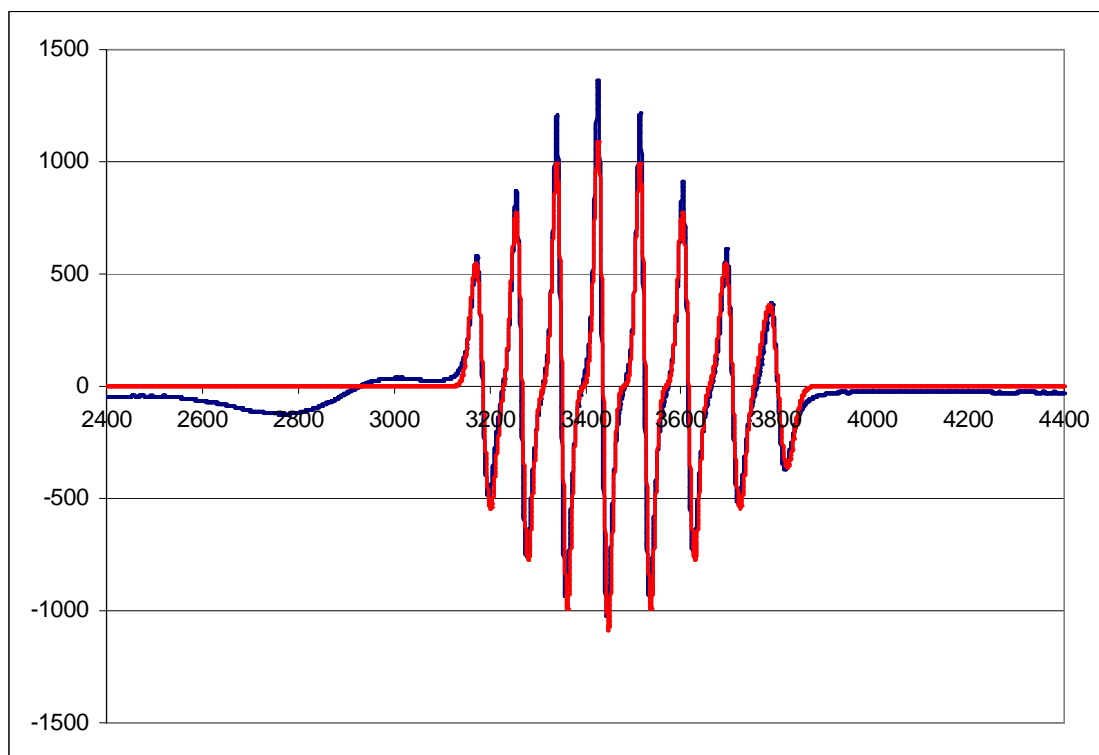

(e)  $V^{IV}$ O-cyclam chloride, **2** in methanol at 298 K

( $g = 1.972$ ,  $A / G = 88$ )

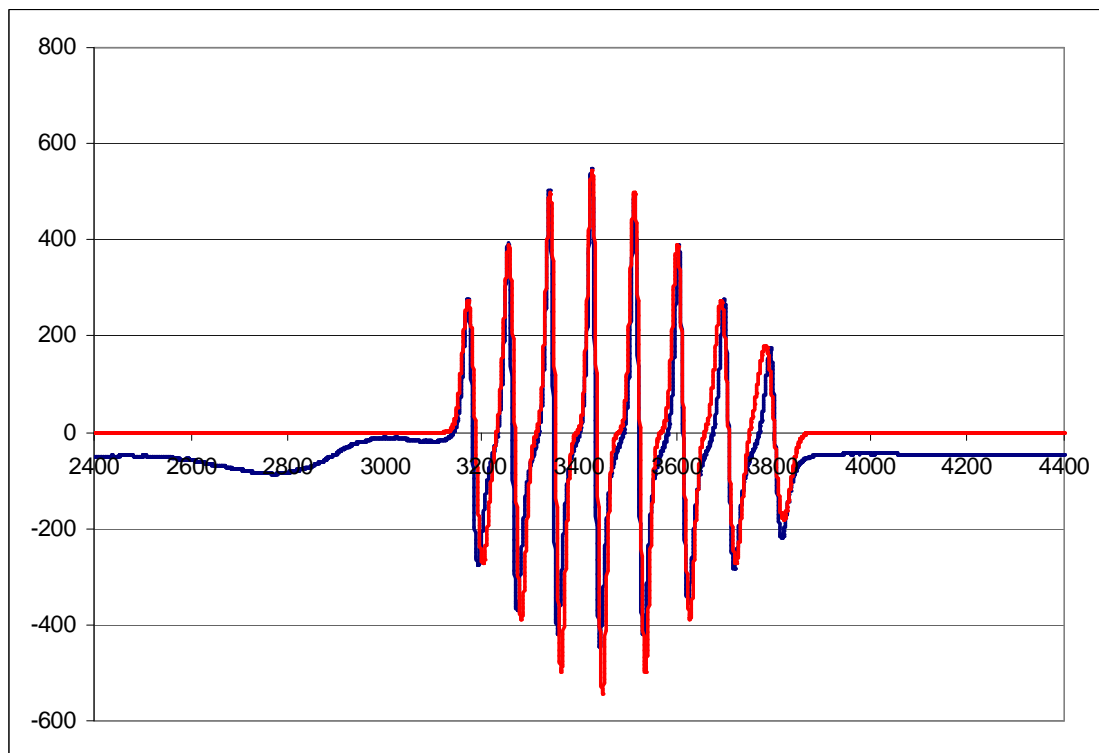

(f)  $V^{IV}$ O-cyclam chloride, **2** in methanol at 77 K

( $g_{x,y} = 1.983$ ,  $A_z / G = 53$ ;  $g_z = 1.968$ ,  $A_z / G = 167$ )

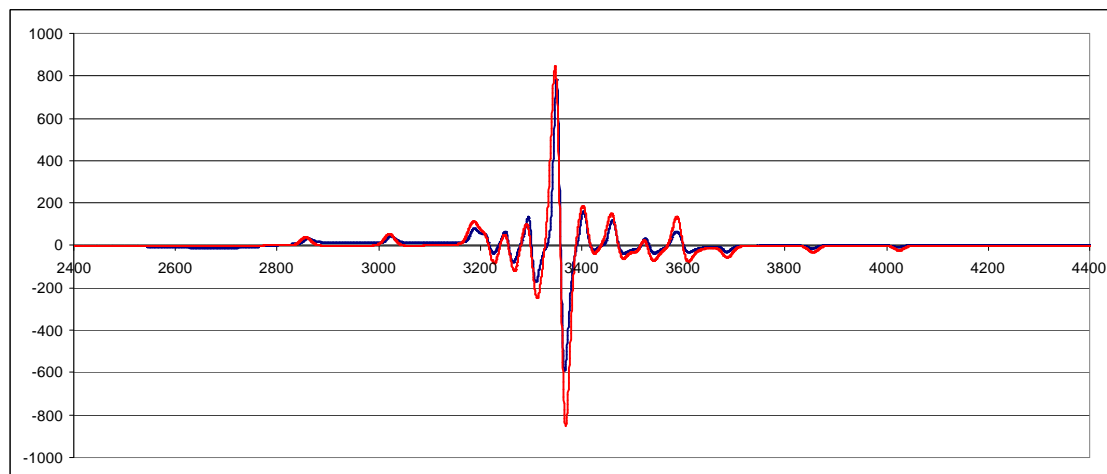

(g)  $V^{IV}$ O-cyclam (aqua) in water at 298 K

(g = 1.972, A / G = 88)

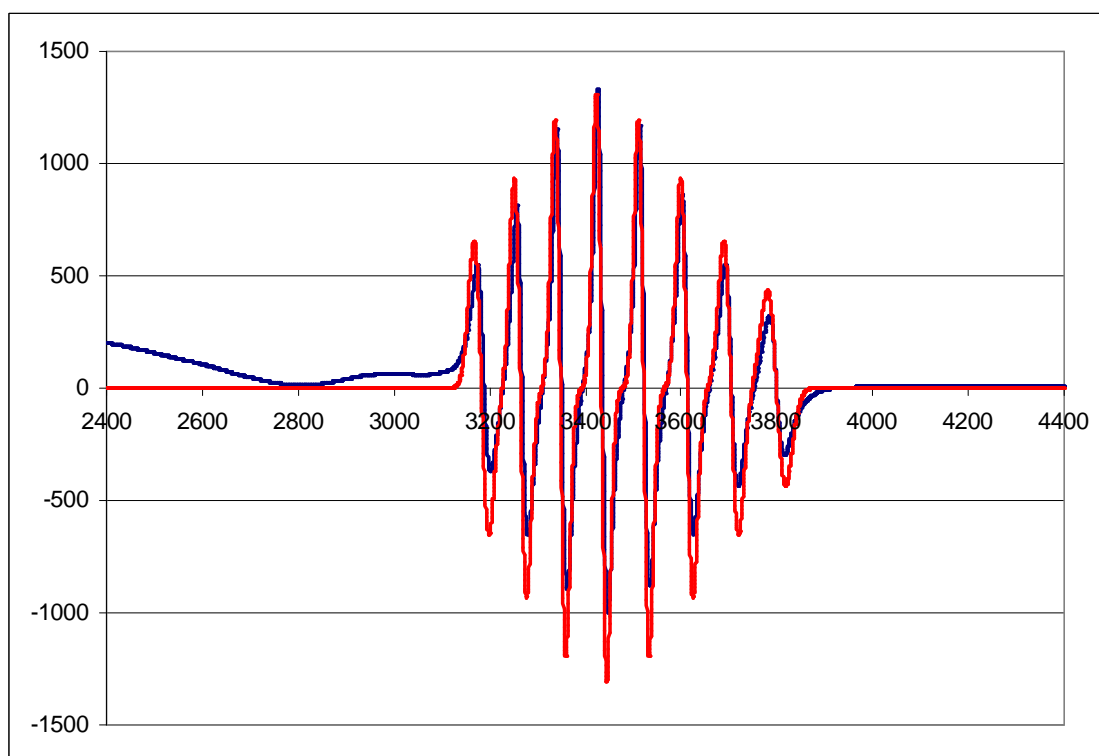

(h)  $V^{IV}$ O-cyclam (aqua) in methanol at 298 K

(g = 1.972, A / G = 88)

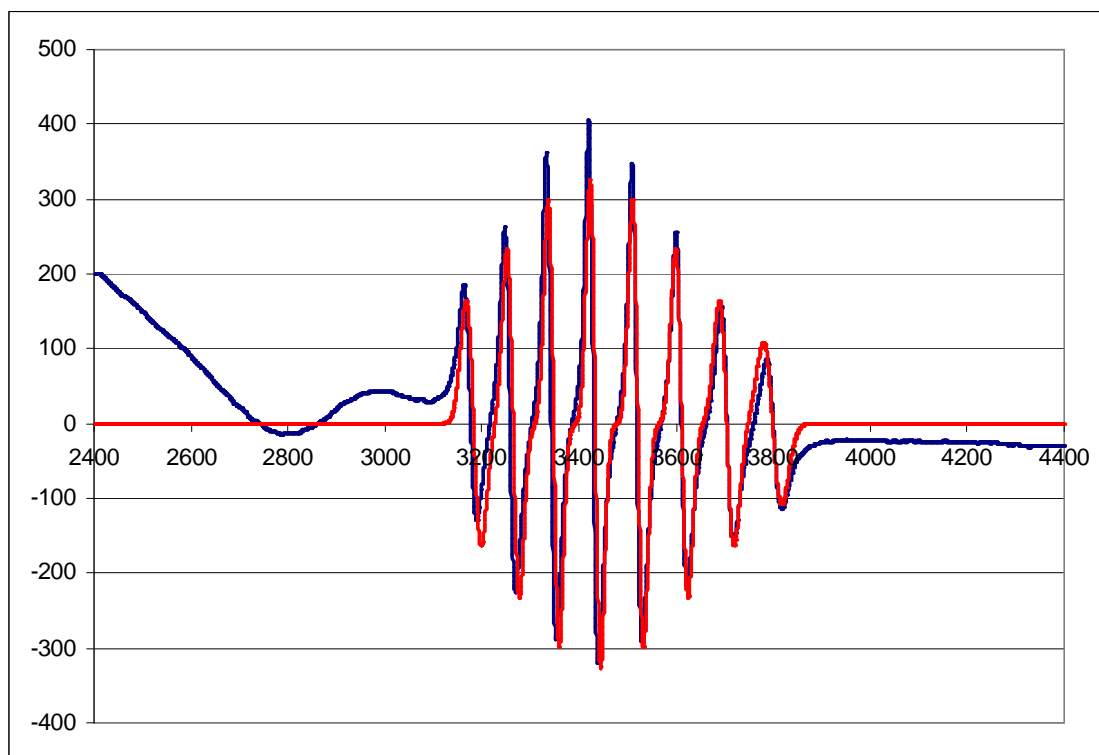

(i)  $V^{IV}$ O-cyclam (aqua) in methanol at 77 K

( $g_{x,y} = 1.983$ ,  $A / G = 53$ ;  $g_z = 1.968$ ,  $A_z / G = 167$ )

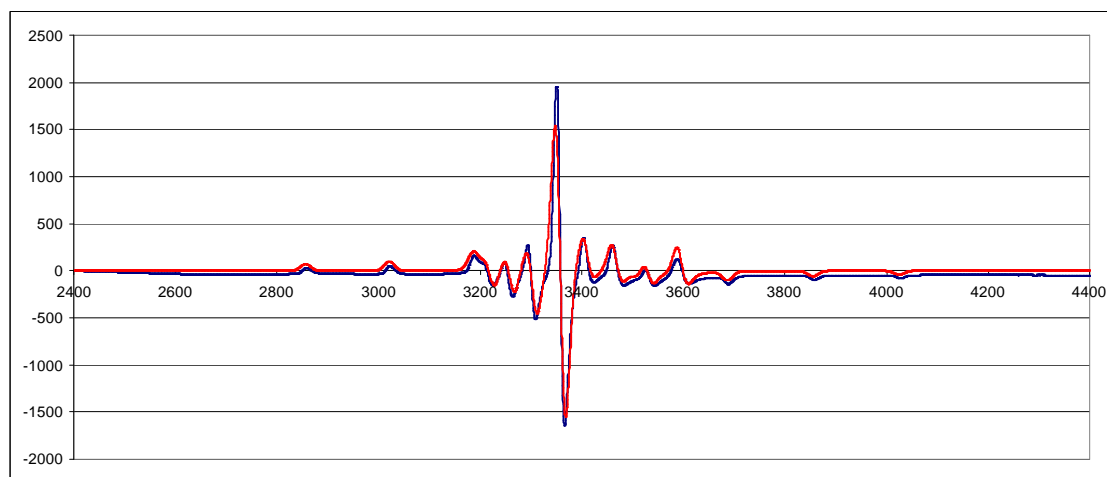

(j)  $[(V^{IV}O)_2\text{-xylylbicyclam}(\text{SO}_4)_2]$ , **3** in water at 298 K

( $g = 1.974$ ,  $A / G = 84$ ;  $g' = 1.972$ ,  $A' / G = 95$ )

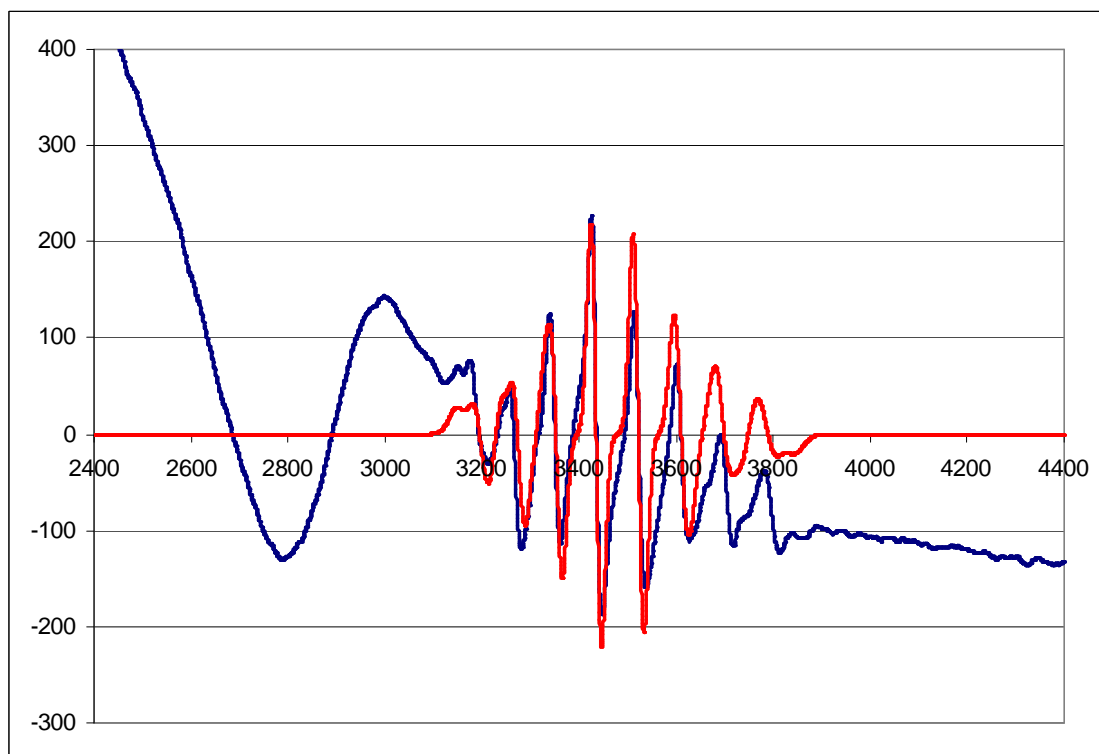

(k)  $[(V^{IV}O)_2\text{-xylylbicyclam}(\text{SO}_4)_2]$ , **3** in methanol at 77 K

( $g_{x,y} = 1.972$ ,  $A_{x,y} / G = 53$ ;  $g_z = 1.957$ ,  $A_z / G = 167$ )

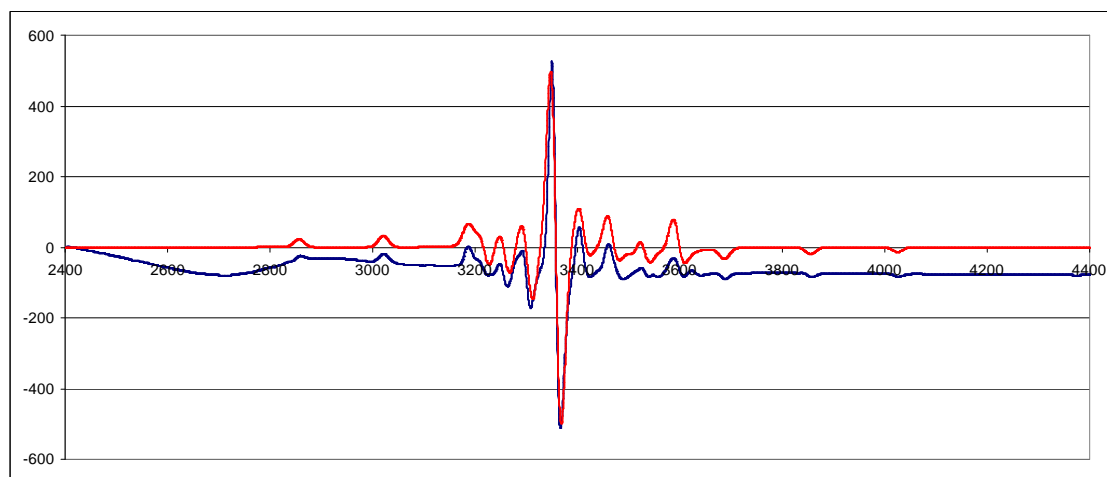



(I)  $[(V^{IV}O)_2\text{-xylylbicyclam}(\text{Cl}_2)]^{2+}$ , **4** in water at 298 K

( $g = 1.972$ ,  $A / G = 87$ ;  $g' = 1.959$ ,  $A' / G = 115$ )

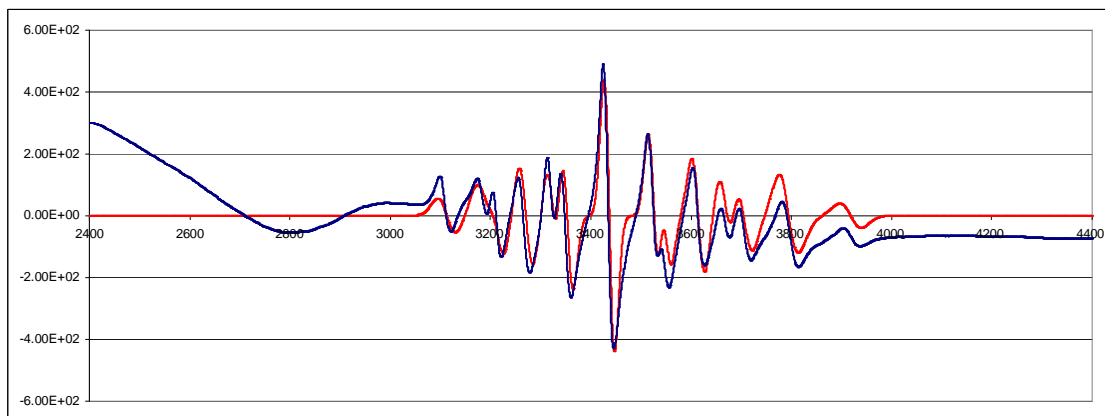

(m)  $(V^{IV}O)_2$ -xylylbicyclam(Cl<sub>2</sub>)<sup>2+</sup>, **4** in methanol at 77 K

(A1:  $g_{x,y} = 1.971$ ,  $A_{x,y} / G = 53$ ;  $g_z = 1.957$ ,  $A_z / G = 167$ )

(A2:  $g_{x,y} = 1.971$ ,  $A_{x,y} / G = 53$ ;  $g_z = 1.950$ ,  $A_z / G = 174$ )

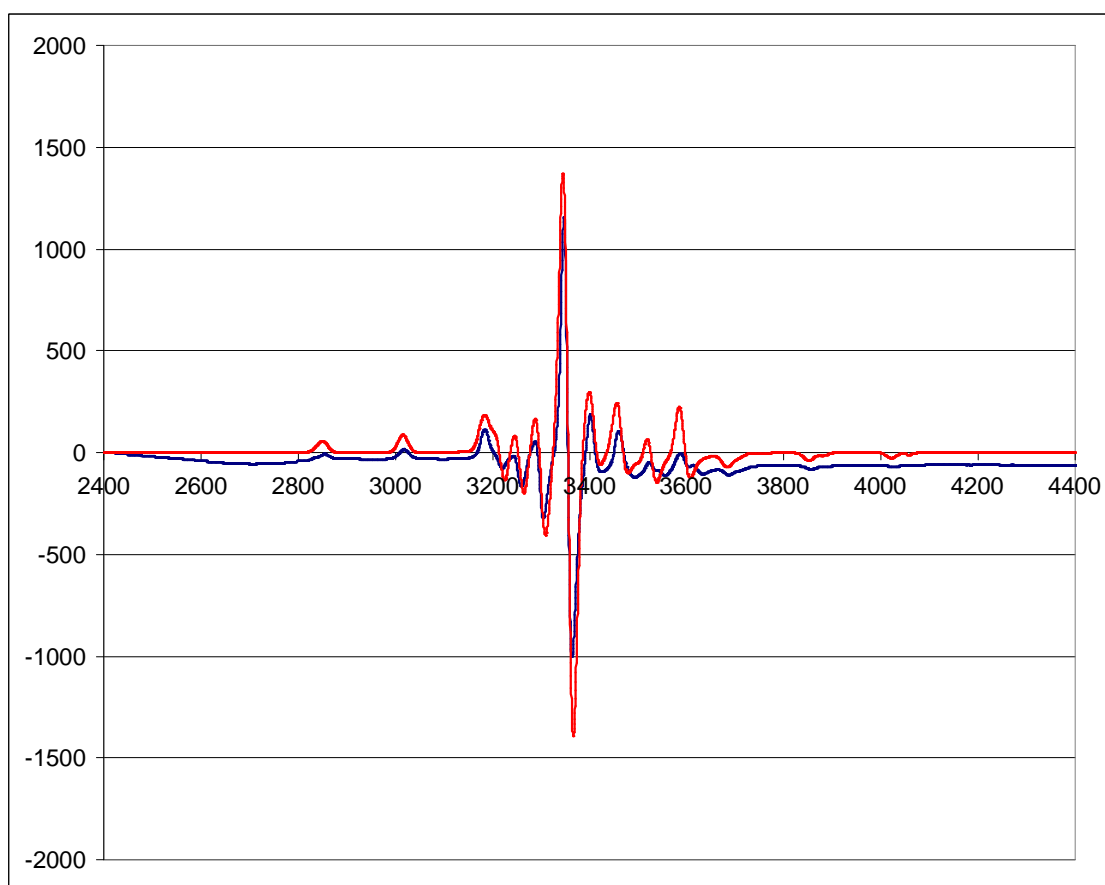

(n)  $(V^{IV}O)_2$ -xylylbicyclam(aqua) in water at 298 K

(g = 1.974, A / G = 88)

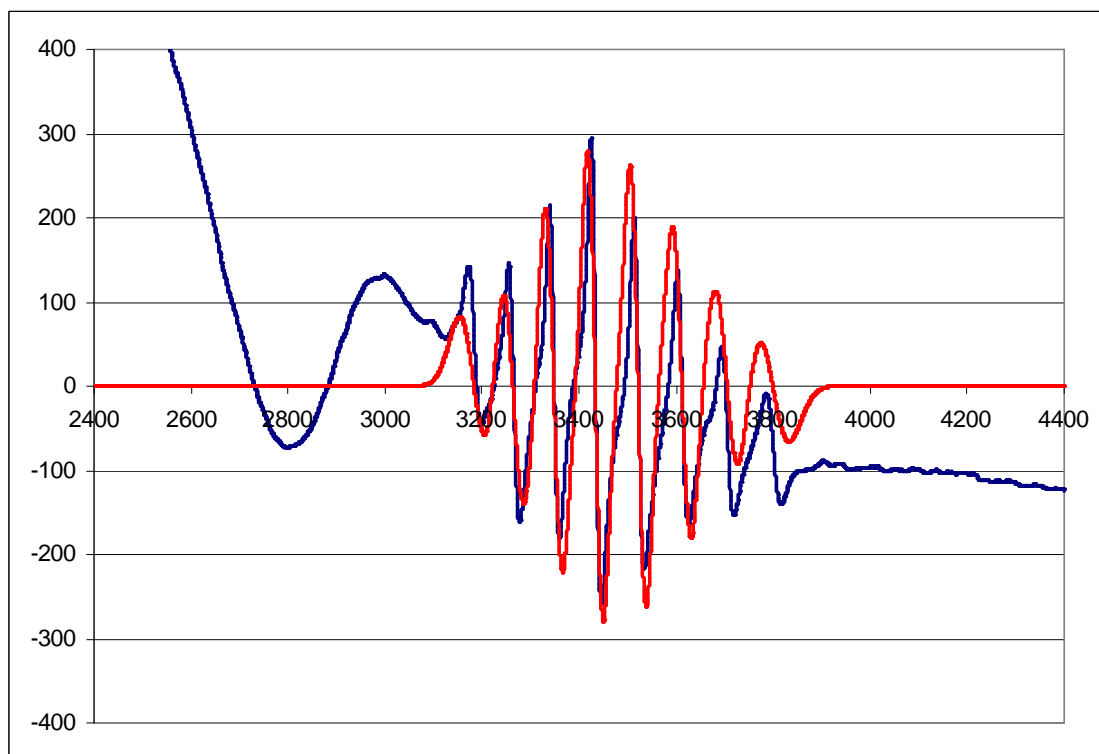

#### 4. Synthesis procedures for solvento complexes

Aqua complexes were synthesised for EPR study to compare spectra of compounds with a solvent molecule as axial ligand *trans*- to the V=O group with those for complexes **1-4** where the axial ligand is sulfate or chloride. These were synthesised in aqueous solution by removing the chloride ligand from complexes **2** and **4** using Ag(PF<sub>6</sub>) to give the aqua complex.

##### **Oxovanadium(IV)-1,4,8,11-tetraazacyclotetradecane·2PF<sub>6</sub>**

Oxovanadium(IV) cyclam dichloride **2** (250 mg, 0.74 mmol) was dissolved in 15 mL distilled water and stirred at room temperature. Silver hexafluorophosphate (374.18 mg, 1.48 mmol, 2 mol. equiv.) was added and an instant precipitate formed in the solution. The mixture was stirred at room temperature for 1 h and separated using centrifugal force (4000 rpm, 30 min). The solvent was removed by freeze-drying to give a crystalline green powder (156.74 mg, 0.59 mmol, 80%). Anal. Calc. for C<sub>10</sub>H<sub>26</sub>N<sub>4</sub>VO<sub>2</sub>·2PF<sub>6</sub>·AgPF<sub>6</sub>·CH<sub>3</sub>OH %C, 15.36; %H, 3.52; %N, 6.51. Found %C, 15.56; %H, 3.47; %N 6.49. ESI-MS: m/z = 265.9 [M-H<sub>2</sub>O]<sup>+</sup>; ν<sub>max</sub> (KBr)/cm<sup>-1</sup> V=O 949.

##### **Oxovanadium(IV)-1-1'-[1,4-phenylenebis(methylene)]-bis(1,4,8,11-tetraazacyclotetradecane)·4PF<sub>6</sub>**

Oxovanadium(IV)-bicyclam chloride (**4**) (30.25 mg, 0.04 mmol) was dissolved in 8 mL HPLC Grade methanol at room temperature. An aqueous solution (2 mL) of silver hexafluorophosphate (40.45 mg, 0.16 mmol, 4 mol. equiv.) was added and an instant white precipitate was observed. The reaction was stirred at room temperature for 16 h. The solution was separated under centrifugal force (4000 rpm, 30 min) resulting in a green solution and white solid. The green solution was filtered and the solvent removed under reduced pressure. The product was further dried under vacuum and dried to a

green powder (10 mg, 0.02 mmol, 40%). Anal. Calc. for  $C_{28}H_{58}N_4V_2O_4 \cdot 4PF_6 \cdot CH_3OH$   
%C, 27.11; %H, 4.86; %N, 8.72. Found %C, 27.95; %H, 5.20; %N 8.12. ESI-MS:  $m/z$   
= 637.2  $[M-2H_2O]^+$ ;  $\nu_{max}$  (K/Br) $cm^{-1}$  V=O 966.

## 5. Solution IR and conductivity measurements

Solution IR spectra for (a)  $\text{MgSO}_4$  (standard) and oxovanadium(IV) cyclam complexes (b) **1** (sulfate) and (c) **2** (chloride)

**Figure S5.** Solution IR and conductivity

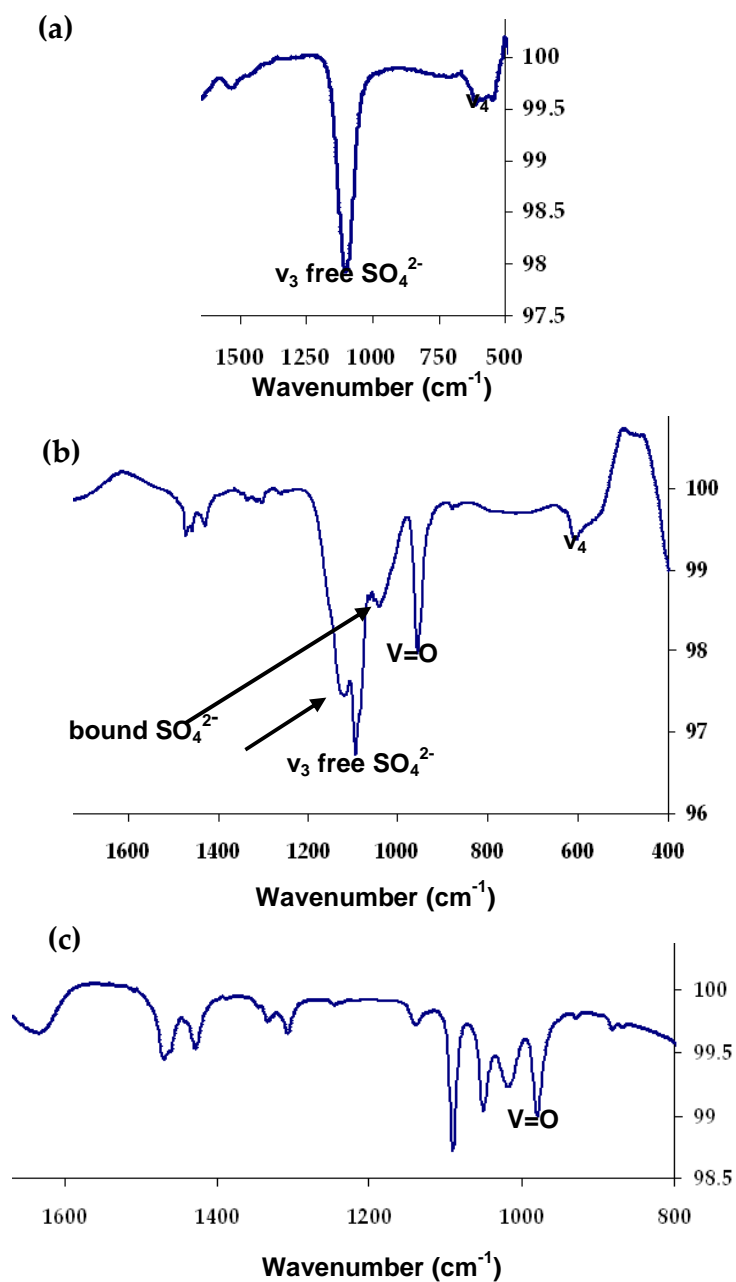

Published experimental values for conductivity measurements of electrolytes in water<sup>2</sup> provide an indication of ranges that may be expected from different ratios of electrolytes in solution.

**Expected Molar Conductance ( $\Lambda_M$ ) Ranges<sup>a</sup> for 2, 3, 4 and 5 Ion Electrolytes ( $\sim 10^{-3}$  M) at 298 K**

| Solvent            | Dielectric Constant | Electrolyte Types |         |         |      |
|--------------------|---------------------|-------------------|---------|---------|------|
|                    |                     | 1:1               | 2:1     | 3:1     | 4:1  |
| Water <sup>3</sup> | 78.4                | 118-131           | 235-273 | 408-435 | ~560 |

<sup>a</sup> Units on all molar conductivities are  $\Omega^{-1} \text{ cm}^2 \text{ mol}^{-1}$

As an example, the order of magnitude expected for neutral complexes is described in the literature as 5-6  $\Omega^{-1} \text{ cm}^2 \text{ mol}^{-1}$  for mixed-ligand complexes ( $1 \times 10^{-3}$  M) of formula  $[\text{M}(\text{bpy})(\text{cbdca})]$  where M is Pd(II) or Pt(II).<sup>4</sup> Values for complexes **1** and **2** are listed in Table S5. Conductivity values for solutions increase in the order: complex 2 >  $\text{MgSO}_4 \sim \text{NaCl}$  > complex 1.

**Table S5. Conductivity measurements for oxovanadium(IV) cyclam complexes (1, 2) and standards**

|                         | 1 mM      | 0.1 mM   |
|-------------------------|-----------|----------|
| <b>NaCl</b>             |           |          |
| t = 0                   | 135 (135) | 160 (16) |
| t = 24 h                | 139 (139) | 150 (15) |
| t = 60 h                | 140 (140) | 160 (16) |
| t = 84 h                | 138 (138) | 160 (16) |
| <b>MgSO<sub>4</sub></b> |           |          |
| t = 0                   | 186 (186) | -        |
| t = 24 h                | 182 (182) | -        |
| <b>Complex 1</b>        |           |          |
| t = 0                   | 61 (61)   | 150 (15) |
| t = 24 h                | 61 (61)   | 150 (15) |
| <b>Complex 2</b>        |           |          |
| t = 0                   | 247 (247) | -        |
| t = 24 h                | 247 (247) | -        |

Units on all molar conductivities are  $\Omega^{-1} \text{ cm}^2 \text{ mol}^{-1}$  and values in brackets represent measured conductivities,  $\kappa$ .



## 6. Crystallographic parameters

**Table S6.** Crystallographic parameters

(a) X-ray crystallographic data for oxovanadium(IV) cyclam complexes

| Axial ligand <i>trans</i> - to V=O | Sulfate<br>(SO <sub>4</sub> <sup>2-</sup> ), 1                                                | Chloride<br>(Cl <sup>-</sup> ), 2                                                               |
|------------------------------------|-----------------------------------------------------------------------------------------------|-------------------------------------------------------------------------------------------------|
| Formula                            | C <sub>34</sub> H <sub>84</sub> N <sub>12</sub> O <sub>19</sub> S <sub>3</sub> V <sub>3</sub> | C <sub>11</sub> H <sub>31</sub> Cl <sub>12</sub> N <sub>4</sub> O <sub>3.5</sub> V <sub>1</sub> |
| Formula weight                     | 1214.13                                                                                       | 397.24                                                                                          |
| Crystal system                     | Trigonal                                                                                      | Monoclinic                                                                                      |
| Space group                        | <i>R</i> 3 <i>c</i>                                                                           | <i>Cc</i>                                                                                       |
| <i>a</i> / Å                       | 25.2262(2)                                                                                    | 15.3070(6)                                                                                      |
| <i>b</i> / Å                       | 25.2262(2)                                                                                    | 13.2387(6)                                                                                      |
| <i>c</i> / Å                       | 15.1963(3)                                                                                    | 18.7031(8)                                                                                      |
| <i>α</i> / °                       | 90                                                                                            | 90                                                                                              |
| <i>β</i> / °                       | 90                                                                                            | 101.165(2)                                                                                      |
| <i>γ</i> / °                       | 120                                                                                           | 90                                                                                              |
| Cell vol. / Å <sup>3</sup>         | 8374.76(19)                                                                                   | 3718.4(3)                                                                                       |
| <i>Z</i>                           | 6                                                                                             | 8                                                                                               |
| Density (Calc) mg/m <sup>3</sup>   | 1.444                                                                                         | 1.419                                                                                           |
| Abs. coeff. mm <sup>-1</sup>       | 0.680                                                                                         | 0.838                                                                                           |
| Reflections collected              | 55545                                                                                         | 54922                                                                                           |
| Independent reflections            | 5575 [R(int) = 0.037]                                                                         | 8887 [R(int) = 0.048]                                                                           |
| R1 (obs/all refl)                  | 0.0292 [3992 data]                                                                            | 0.0543 [8478 data]                                                                              |
| wR2 (obs/all refl)                 | 0.0849                                                                                        | 0.1491                                                                                          |

(b) Selected bond lengths (Å) and angles (°) for oxovanadium(IV) cyclam complexes

| Axial ligand <i>trans</i> - to V=O |                                                 | Sulfate (SO <sub>4</sub> <sup>2-</sup> ), 1 | Chloride (Cl <sup>-</sup> ), 2         |
|------------------------------------|-------------------------------------------------|---------------------------------------------|----------------------------------------|
| <b>V-N bond lengths</b>            | N(1)-V(15) N(4)-V(15)<br>N(8)-V(15) N(11)-V(15) | 2.107(2) 2.114(2)<br>2.0841(19) 2.0976(19)  | 2.097(4) 2.097(4)<br>2.081(4) 2.082(4) |
| <b>V=O bond lengths</b>            | V(15)-O(16)                                     | 1.6093(17)                                  | 1.599(3)                               |
| <b>V-L* bond lengths</b>           |                                                 | 2.1359(16)<br>V(15)-O(17)                   | 2.6501(12)<br>V(15)-Cl(17)             |
| <b>Bond angles</b>                 | N(1)-V-N(11)                                    | 95.98(8)                                    | 95.67(16)                              |
|                                    | N(4)-V-N(1)                                     | 84.27(9)                                    | 83.91(15)                              |
|                                    | N(4)-V-N(8)                                     | 92.92(8)                                    | 92.12(15)                              |
|                                    | N(8)-V-N(1)                                     | 166.88(7)                                   | 165.46(16)                             |
|                                    | N(1)-V-L*                                       | 93.92(9)                                    | 83.39(12)                              |
|                                    | L-V=O                                           | 177.83(9)                                   | 176.99(12)                             |

\* L = bonding atom of axial ligand *trans*- to V=O.

## 7. References

- (1) Pannecouque, C.; Daelemans, D.; De Clercq, E. *Nat. Protocol.* **2008**, *3*, 427-434.
- (2) Angelica, R. J. *Synthesis and Technique in Inorganic Chemistry*. 2 ed.; W B Saunders Company: Philadelphia, 1977.
- (3) Sneed, M.; Maynard, J., *General Inorganic Chemistry*. Van Nostrand: New York, 1942; p 813.
- (4) Mansuri-Torshizi, H.; Ghadimy, S.; Akbarzadeh, N. *Chem. Pharm. Bull.* **2001**, *49*, 1517-1520.
